# Supplementary material
Source: publisher figshare collection journal article supplement (https://gsapubs.figshare.com/ndownloader/files/23291525)

**Captions for Supplemental Figures**

Figure DR1. Locality map of sample areas in England and Wales. Numbers correspond to sites listed in Table DR1.

Figure DR2. Rock exposure:outcrop ratio of coastal and inland areas (Wilcoxon test:  $W = 472$ ,  $p = 0.002$ ).

Figure DR3. Rock exposure:outcrop ratio of Paleozoic and post-Paleozoic areas (Wilcoxon test:  $W = 439$ ,  $p = 0.01$ ).

Figure DR4. Rock exposure:outcrop ratio of sandstone-, limestone- and mudstone-dominated areas (Kruskal-Wallis test:  $H = 7.29$ ,  $p = 0.03$ ). There were significant differences between sandstone and mudstone ( $W = 254$ ,  $p = 0.03$ ) and limestone and mudstone ( $W = 166.5$ ,  $p = 0.03$ ), but no significant differences between sandstone and limestone ( $W = 87$ ,  $p = 0.28$ ).

Figure DR5. Rock exposure:outcrop ratio of urban-, managed rural- and unmanaged rural-dominated areas (Kruskal-Wallis test:  $H = 3.4$ ,  $p = 0.18$ ).

Figure DR6. Rock exposure:outcrop ratio of urban-, managed rural- and unmanaged rural-dominated inland areas (Kruskal-Wallis test:  $H = 11.1$ ,  $p = 0.004$ ). There were significant differences between urban and unmanaged rural ( $W = 4$ ,  $p = 0.004$ ) and between managed rural and unmanaged rural ( $W = 14.5$ ,  $p = 0.01$ ), but no significant difference between urban and managed rural ( $W = 30$ ,  $p = 0.36$ ).

Figure DR7. Relationship between outcrop area (m<sup>2</sup>) and exposure area (m<sup>2</sup>) when sample areas with zero rock exposure are removed (Spearman:  $r_s = 0.07$ ,  $p = 0.68$ ).

Figure DR8. Relationship between outcrop area (m<sup>2</sup>) and exposure area (m<sup>2</sup>) for inland areas (Spearman:  $r_s = -0.45$ ,  $p = 0.02$ ).

Figure DR9. Relationship between outcrop area (m<sup>2</sup>) and exposure area (m<sup>2</sup>) for inland areas when sample areas with zero exposure are removed (Spearman:  $r_s = -0.54$ ,  $p = 0.07$ ).

Figure DR10. Relationship between outcrop area (m<sup>2</sup>) and exposure area (m<sup>2</sup>) for coastal areas (Pearson:  $r = 0.09$ ,  $p = 0.67$ ).

Figure DR11. Relationship between outcrop area (m<sup>2</sup>) and exposure area (m<sup>2</sup>) for Paleozoic areas (Spearman:  $r_s = 0.02$ ,  $p = 0.91$ ).

Figure DR12. Relationship between outcrop area (m<sup>2</sup>) and exposure area (m<sup>2</sup>) for Mesozoic areas (Spearman:  $r_s = -0.53$ ,  $p = 0.01$ ).

Figure DR13. Relationship between outcrop area (m<sup>2</sup>) and exposure area (m<sup>2</sup>) for Mesozoic areas when sample areas with zero exposure are removed (Spearman:  $r_s = -0.34$ ,  $p = 0.31$ ).

Figure DR14. Relationship between outcrop area (m<sup>2</sup>) and exposure area (m<sup>2</sup>) for post-Paleozoic areas (Spearman:  $r_s = -0.45$ ,  $p = 0.02$ ).

Figure v15. Relationship between outcrop area (m<sup>2</sup>) and exposure area (m<sup>2</sup>) for post-Paleozoic areas when sample areas with zero exposure are removed (Spearman:  $r_s = -0.34$ ,  $p = 0.31$ ).

Figure DR16. Relationship between outcrop area (m<sup>2</sup>) and exposure area (m<sup>2</sup>) for sandstone-dominated areas (Spearman:  $r_s = 0.19$ ,  $p = 0.44$ ).

Figure DR17. Relationship between outcrop area (m<sup>2</sup>) and exposure area (m<sup>2</sup>) for limestone-dominated areas (Pearson:  $r = -0.03$ ,  $p = 0.92$ ).

Figure DR18. Relationship between outcrop area (m<sup>2</sup>) and exposure area (m<sup>2</sup>) for mudstone-dominated areas (Spearman:  $r_s = -0.41$ ,  $p = 0.08$ ).

Figure DR19. Relationship between outcrop area (m<sup>2</sup>) and exposure area (m<sup>2</sup>) for urban-dominated areas (Spearman:  $r_s = -0.28$ ,  $p = 0.29$ ).

Figure DR20. Relationship between outcrop area (m<sup>2</sup>) and exposure area (m<sup>2</sup>) for managed rural-dominated areas (Spearman:  $r_s = -0.15$ ,  $p = 0.49$ ).

Figure DR21. Relationship between outcrop area (m<sup>2</sup>) and exposure area (m<sup>2</sup>) for unmanaged rural-dominated areas (Spearman:  $r_s = -0.26$ ,  $p = 0.44$ ).

Figure DR22. Relationship between number of sedimentary rock formations and rock outcrop area (m<sup>2</sup>) when sample areas with 1 sedimentary rock formation are removed (Spearman:  $r_s = -0.19$ ,  $p = 0.79$ ).

Figure DR23. Relationship between number of sedimentary rock formations and rock exposure area ( $\text{m}^2$ ) when sample areas with 1 sedimentary rock formation are removed (Spearman:  $r_s = -0.04$ ,  $p = 0.87$ ).

Figure DR24. Relationship between number of sedimentary rock formations and rock outcrop:exposure ratio when sample areas with 1 sedimentary rock formation are removed (Spearman:  $r_s = -0.05$ ,  $p = 0.83$ ).

Figure DR25. Relationship between elevation (m) and rock exposure:outcrop ratio for all areas (Spearman:  $r_s = -0.03$ ,  $p = 0.85$ ).

Figure DR26. Relationship between elevation (m) and rock exposure:outcrop ratio inland areas when areas with large man-made exposure are removed (Spearman:  $r_s = 0.72$ ,  $p < 0.001$ ).

Figure DR27. Relationships between mean strata age (Ma) and elevation (m) for all areas (Spearman:  $r_s = 0.41$ ,  $p = 0.003$ ), inland areas only (Spearman:  $r_s = 0.63$ ,  $p < 0.001$ ) and coastal areas only (Spearman:  $r_s = 0.17$ ,  $p = 0.44$ ).

TABLE DR1. SUMMARY OF SAMPLE AREA DATA

| ID | Locality name        | BGS map sheet   | Exposure area (m2) | Outcrop area (m2) | Exposure:outcrop ratio | No. of formations | Elevation<br>(m) | Lithology | Period        | Eon       | Age class      | Min. strata age (Ma) | Max. strata age (Ma) | Coastal | Land use        |
|----|----------------------|-----------------|--------------------|-------------------|------------------------|-------------------|------------------|-----------|---------------|-----------|----------------|----------------------|----------------------|---------|-----------------|
| 1  | Aberyswyth           | 163             | 73254              | 958920            | 0.07639                | 1                 | 6                | Sandstone | Silurian      | Paleozoic | Paleozoic      | 428                  | 443                  | coastal | urban           |
| 2  | Ainsdale             | 83              | 0                  | 1183870           | 0                      | 1                 | 6                | Mudstone  | Triassic      | Mesozoic  | post-Paleozoic | 220.7                | 244.8                | coastal | rural unmanaged |
| 3  | Alum Rock            | 168             | 861                | 977251            | 0.00088                | 1                 | 112              | Mudstone  | Triassic      | Mesozoic  | post-Paleozoic | 205.7                | 248.2                | inland  | urban           |
| 4  | Anelog               | 133             | 90770              | 936442            | 0.09693                | 1                 | 69               | Sandstone | Cambrian      | Paleozoic | Paleozoic      | 518                  | 650                  | coastal | rural managed   |
| 5  | Blidworth            | 113             | 0                  | 831371            | 0                      | 1                 | 94               | Sandstone | Triassic      | Mesozoic  | post-Paleozoic | 241.7                | 248.2                | inland  | rural managed   |
| 6  | Bude                 | 307;308;322;323 | 147119             | 975151            | 0.15087                | 1                 | 23               | Sandstone | Carboniferous | Paleozoic | Paleozoic      | 308.5                | 316                  | coastal | rural managed   |
| 7  | Calver               | 111             | 57061              | 671529            | 0.08497                | 4                 | 268              | Limestone | Carboniferous | Paleozoic | Paleozoic      | 316                  | 333.8                | inland  | rural managed   |
| 8  | Capel Y Ffid         | 214             | 173921             | 354183            | 0.49105                | 1                 | 569              | Sandstone | Devonian      | Paleozoic | Paleozoic      | 391                  | 412                  | inland  | rural unmanaged |
| 9  | Colwyn Bay           | 95              | 222019             | 988592            | 0.22458                | 2                 | 56               | Limestone | Carboniferous | Paleozoic | Paleozoic      | 327                  | 344                  | coastal | urban           |
| 10 | Dawlish              | 339             | 32501              | 690458            | 0.04707                | 1                 | 33               | Sandstone | Permian       | Paleozoic | Paleozoic      | 248.2                | 290                  | coastal | urban           |
| 11 | Derwent Water        | 29              | 13634              | 770079            | 0.0177                 | 1                 | 180              | Mudstone  | Ordovician    | Paleozoic | Paleozoic      | 470                  | 495                  | inland  | rural unmanaged |
| 12 | Dover                | 305;306         | 84344              | 729165            | 0.11567                | 5                 | 35               | Limestone | Cretaceous    | Mesozoic  | post-Paleozoic | 83.5                 | 98.9                 | coastal | rural managed   |
| 13 | Durham               | 26;27           | 0                  | 882498            | 0                      | 1                 | 58               | Mudstone  | Carboniferous | Paleozoic | Paleozoic      | 308.5                | 313.5                | inland  | urban           |
| 14 | Fairford             | 235             | 0                  | 743526            | 0                      | 1                 | 99               | Limestone | Jurassic      | Mesozoic  | post-Paleozoic | 159.4                | 169.2                | inland  | rural managed   |
| 15 | Felixstowe           | 208;225         | 0                  | 836000            | 0                      | 1                 | 2                | Sandstone | Palaeogene    | Cenozoic  | post-Paleozoic | 54.8                 | 65                   | coastal | urban           |
| 16 | Flamborough Head     | 55;65           | 123567             | 699269            | 0.17671                | 3                 | 28               | Limestone | Cretaceous    | Mesozoic  | post-Paleozoic | 71.3                 | 98.9                 | coastal | rural managed   |
| 17 | Greenfield Reservoir | 86              | 14393              | 766946            | 0.01877                | 1                 | 341              | Sandstone | Carboniferous | Paleozoic | Paleozoic      | 316                  | 327                  | inland  | rural unmanaged |
| 18 | Hastings             | 320;321         | 105407             | 759319            | 0.13882                | 2                 | 52               | Sandstone | Cretaceous    | Mesozoic  | post-Paleozoic | 132                  | 142                  | coastal | rural unmanaged |
| 19 | Holy Island          | 4               | 167238             | 874746            | 0.19118                | 1                 | 9                | Limestone | Carboniferous | Paleozoic | Paleozoic      | 325.4                | 354                  | coastal | rural unmanaged |
| 20 | Horncastle           | 115             | 0                  | 1102095           | 0                      | 1                 | 43               | Mudstone  | Jurassic      | Mesozoic  | post-Paleozoic | 145.6                | 154.1                | inland  | rural managed   |
| 21 | Hunstanton           | 129             | 15890              | 821232            | 0.01935                | 5                 | 23               | Limestone | Cretaceous    | Mesozoic  | post-Paleozoic | 89                   | 127                  | coastal | urban           |
| 22 | Ilkley               | 69              | 29733              | 797289            | 0.03729                | 1                 | 272              | Sandstone | Carboniferous | Paleozoic | Paleozoic      | 316                  | 327                  | inland  | rural unmanaged |
| 23 | Landcombe            | 350;355;356     | 15419              | 526483            | 0.02929                | 1                 | 31               | Sandstone | Devonian      | Paleozoic | Paleozoic      | 400                  | 417                  | coastal | rural managed   |
| 24 | Leeds                | 70              | 0                  | 1037594           | 0                      | 1                 | 53               | Mudstone  | Carboniferous | Paleozoic | Paleozoic      | 313.5                | 316                  | inland  | urban           |
| 25 | Linshiels            | 5;8             | 167303             | 736428            | 0.22718                | 2                 | 231              | Limestone | Carboniferous | Paleozoic | Paleozoic      | 333.8                | 354                  | inland  | rural unmanaged |
| 26 | Llandyfriog          | 194             | 251                | 925455            | 0.00027                | 2                 | 94               | Mudstone  | Ordovician    | Paleozoic | Paleozoic      | 443                  | 449                  | inland  | rural managed   |
| 27 | London               | 270             | 0                  | 903869            | 0                      | 1                 | 15               | Mudstone  | Palaeogene    | Cenozoic  | post-Paleozoic | 33.7                 | 54.8                 | inland  | urban           |
| 28 | Lulworth Cove        | 341;342;343     | 106973             | 840702            | 0.12724                | 12                | 28               | Limestone | Cretaceous    | Mesozoic  | post-Paleozoic | 49                   | 145.6                | coastal | rural managed   |
| 29 | Manorbier Bay        | 244;245         | 108396             | 560107            | 0.19353                | 2                 | 19               | Sandstone | Devonian      | Paleozoic | Paleozoic      | 364                  | 423                  | coastal | rural managed   |
| 30 | Mappleton            | 73              | 0                  | 928015            | 0                      | 1                 | 15               | Limestone | Cretaceous    | Mesozoic  | post-Paleozoic | 65                   | 83.5                 | coastal | rural managed   |
| 31 | Mevagissey           | 353             | 51597              | 712854            | 0.07238                | 1                 | 46               | Sandstone | Devonian      | Paleozoic | Paleozoic      | 364                  | 380                  | coastal | rural managed   |
| 32 | Much Wenlock         | 152             | 87906              | 1400282           | 0.06278                | 2                 | 164              | Mudstone  | Silurian      | Paleozoic | Paleozoic      | 421                  | 428                  | inland  | rural managed   |
| 33 | Nettlestone          | 331             | 60854              | 942467            | 0.06457                | 3                 | 31               | Mudstone  | Palaeogene    | Cenozoic  | post-Paleozoic | 23.8                 | 41.3                 | coastal | rural managed   |
| 34 | North York Moors     | 43              | 0                  | 555053            | 0                      | 3                 | 310              | Sandstone | Jurassic      | Mesozoic  | post-Paleozoic | 169.2                | 176.5                | inland  | rural unmanaged |
| 35 | Northampton          | 185             | 0                  | 994801            | 0                      | 2                 | 59               | Mudstone  | Jurassic      | Mesozoic  | post-Paleozoic | 176.5                | 189.6                | inland  | urban           |
| 36 | Oakmere              | 109             | 0                  | 1059396           | 0                      | 1                 | 79               | Mudstone  | Triassic      | Mesozoic  | post-Paleozoic | 234.3                | 241.7                | inland  | rural managed   |
| 37 | Oxford               | 236             | 0                  | 1128304           | 0                      | 1                 | 60               | Mudstone  | Jurassic      | Mesozoic  | post-Paleozoic | 154.1                | 164.4                | inland  | urban           |
| 38 | Pennant Melangell    | 136             | 111480             | 589948            | 0.18897                | 2                 | 443              | Mudstone  | Ordovician    | Paleozoic | Paleozoic      | 428                  | 449                  | inland  | rural unmanaged |
| 39 | Quarnford            | 111             | 0                  | 478973            | 0                      | 1                 | 431              | Sandstone | Carboniferous | Paleozoic | Paleozoic      | 316                  | 327                  | inland  | rural managed   |
| 40 | Sandwith             | 28              | 117407             | 947951            | 0.12385                | 1                 | 83               | Sandstone | Triassic      | Mesozoic  | post-Paleozoic | 241.7                | 248.2                | coastal | rural managed   |
| 41 | Scarborough          | 44;54           | 24385              | 731351            | 0.03334                | 7                 | 37               | Sandstone | Jurassic      | Mesozoic  | post-Paleozoic | 154.1                | 176.5                | coastal | urban           |
| 42 | Sheffield            | 100             | 0                  | 918603            | 0                      | 1                 | 117              | Mudstone  | Carboniferous | Paleozoic | Paleozoic      | 313.5                | 316                  | inland  | urban           |
| 43 | Snaizeholme          | 50              | 19321              | 251189            | 0.07692                | 2                 | 633              | Sandstone | Carboniferous | Paleozoic | Paleozoic      | 316                  | 327                  | inland  | rural unmanaged |
| 44 | Southburgh           | 161             | 0                  | 1074228           | 0                      | 1                 | 48               | Limestone | Cretaceous    | Mesozoic  | post-Paleozoic | 71.3                 | 93.5                 | inland  | rural managed   |
| 45 | Southend             | 258;259         | 0                  | 771600            | 0                      | 1                 | 14               | Mudstone  | Palaeogene    | Cenozoic  | post-Paleozoic | 33.7                 | 54.8                 | coastal | urban           |
| 46 | St Donats            | 261;262         | 120204             | 809054            | 0.14857                | 1                 | 24               | Mudstone  | Jurassic      | Mesozoic  | post-Paleozoic | 201.9                | 205.7                | coastal | rural managed   |
| 47 | Stamford Bridge      | 63              | 0                  | 1171920           | 0                      | 1                 | 23               | Mudstone  | Triassic      | Mesozoic  | post-Paleozoic | 205.7                | 248.2                | inland  | rural managed   |
| 48 | Warminster           | 297             | 579                | 830314            | 0.0007                 | 2                 | 162              | Sandstone | Cretaceous    | Mesozoic  | post-Paleozoic | 98.9                 | 112.2                | inland  | rural managed   |
| 49 | Watchet              | 278;279;294;295 | 212791             | 778736            | 0.27325                | 4                 | 7                | Mudstone  | Triassic      | Mesozoic  | post-Paleozoic | 189.6                | 248.2                | coastal | urban           |
| 50 | Whitburn             | 21              | 141494             | 837300            | 0.16899                | 1                 | 16               | Limestone | Permian       | Paleozoic | Paleozoic      | 248.2                | 256                  | coastal | urban           |

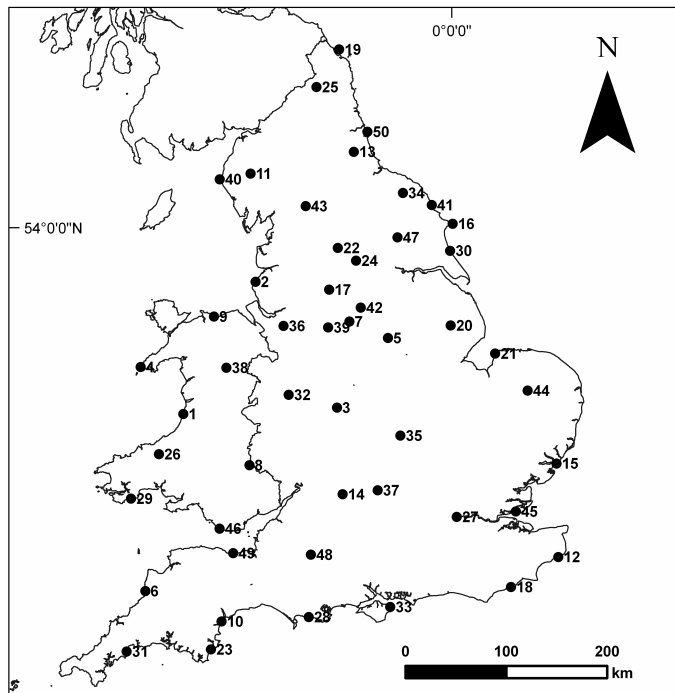

Figure S1

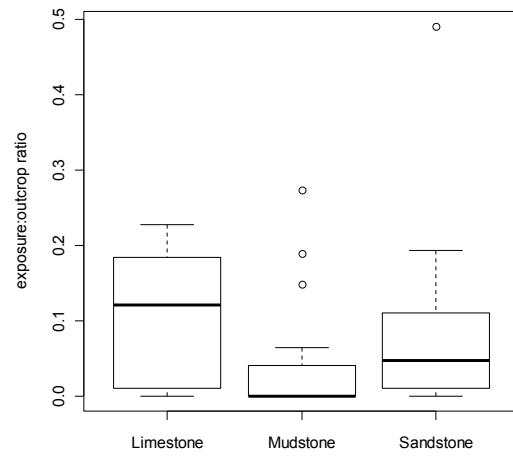

Figure S4

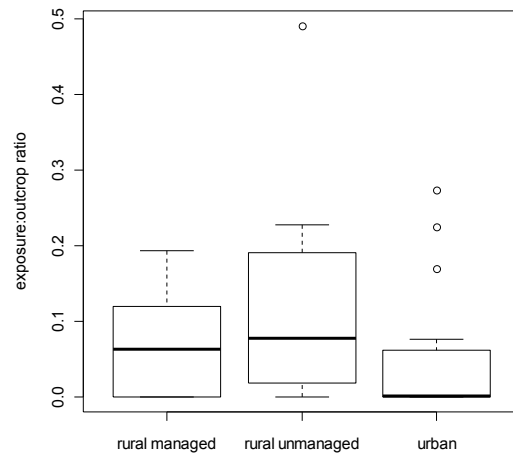

Figure S5

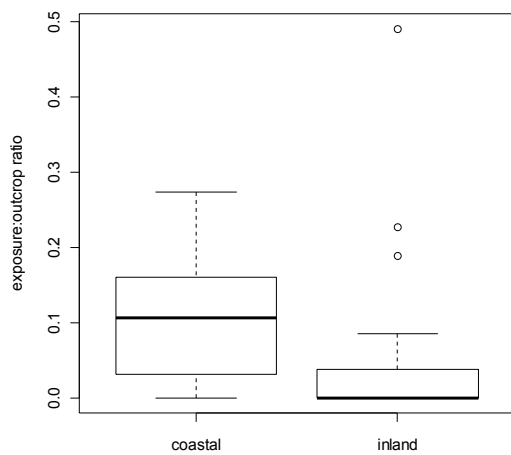

Figure S2

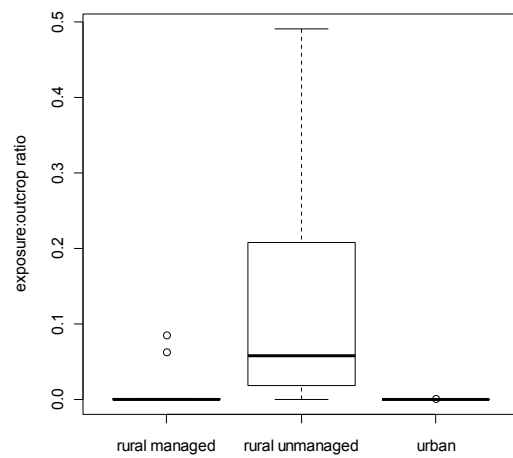

Figure S6

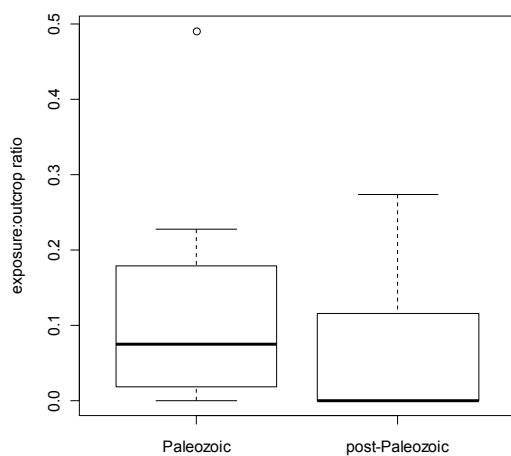

Figure S3

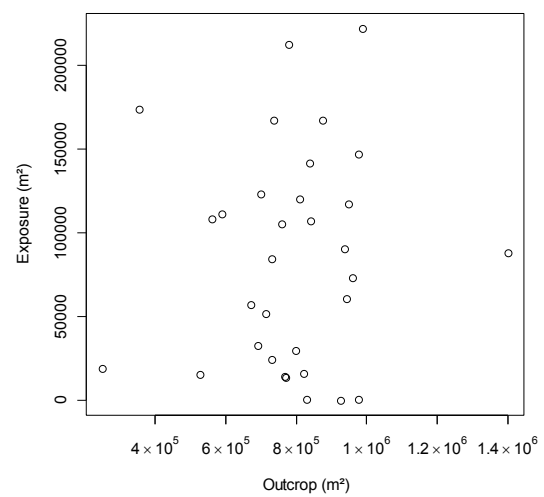

Figure S7

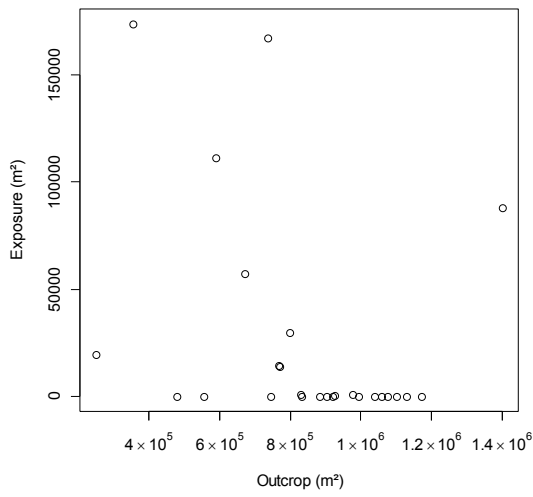

Figure S8

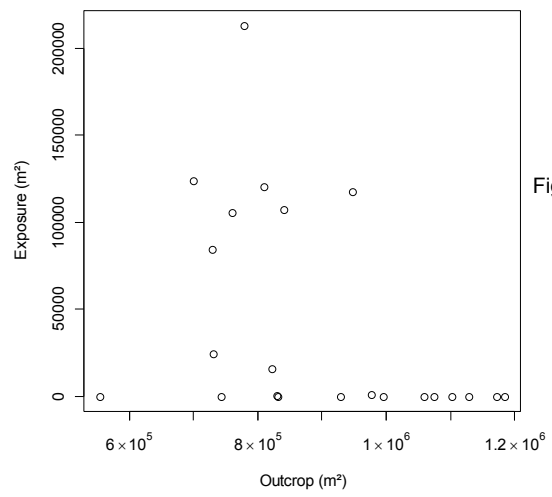

Figure S12

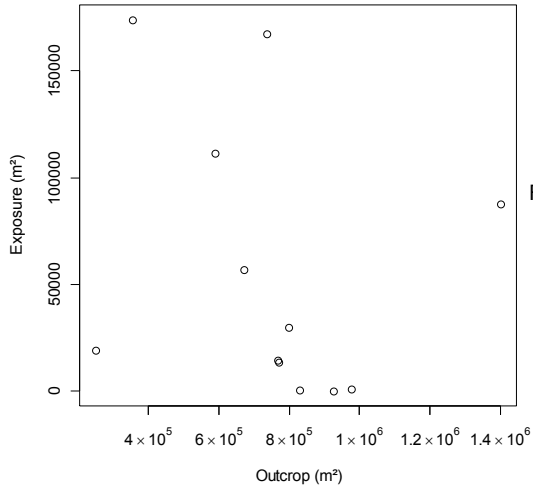

Figure S9

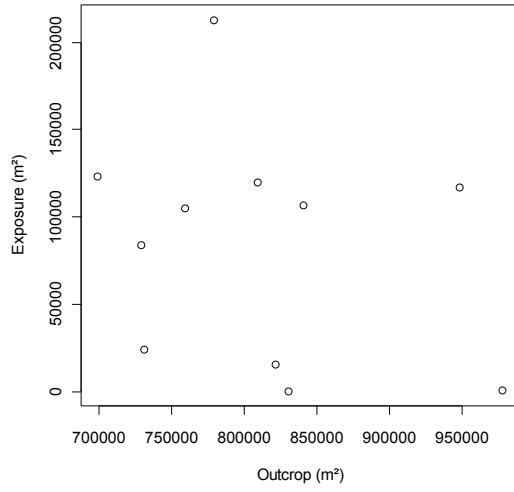

Figure S13

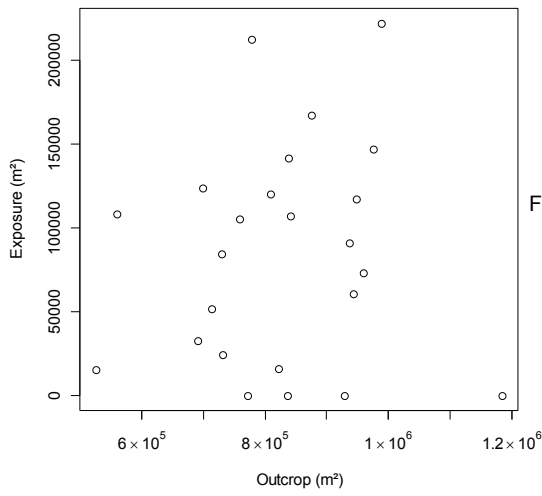

Figure S10

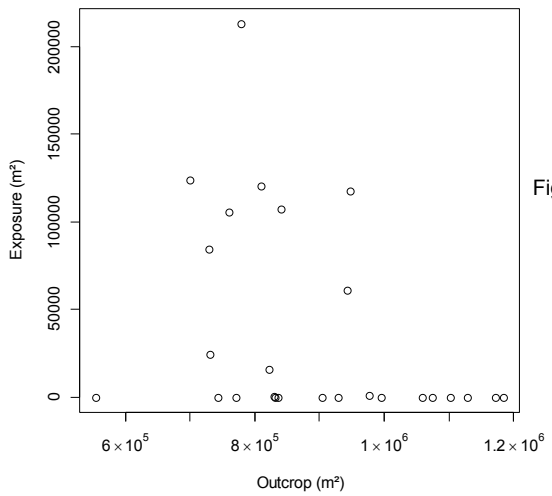

Figure S14

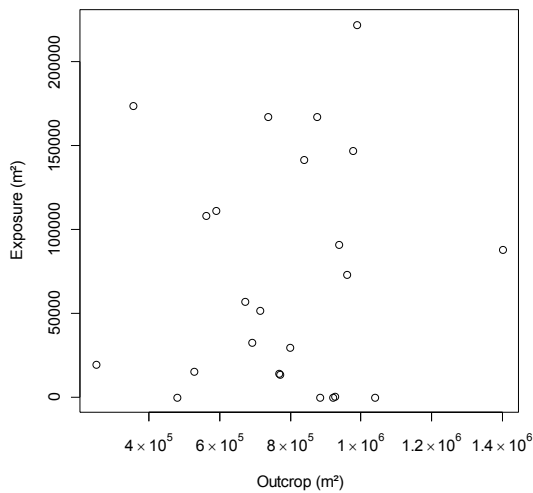

Figure S11

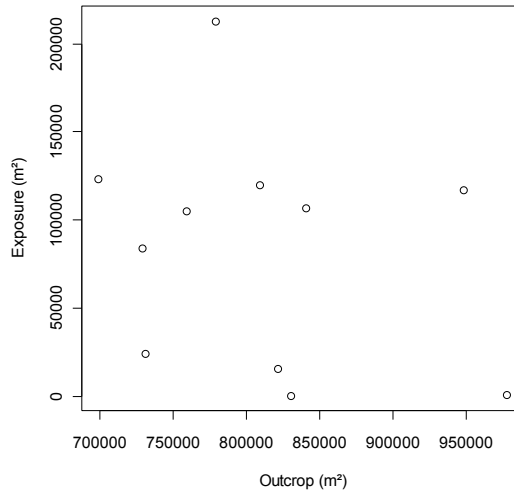

Figure S15

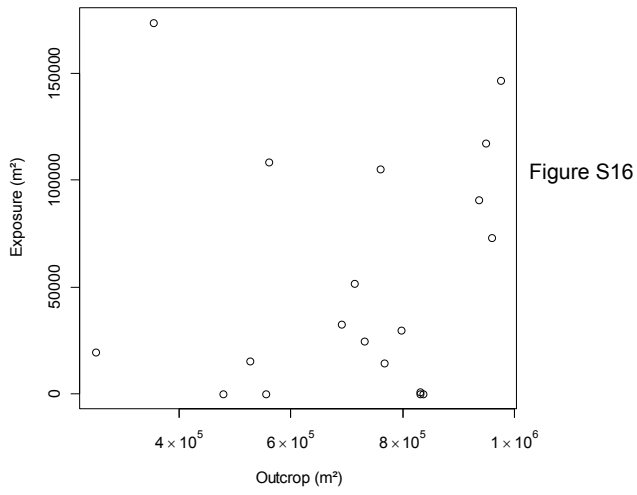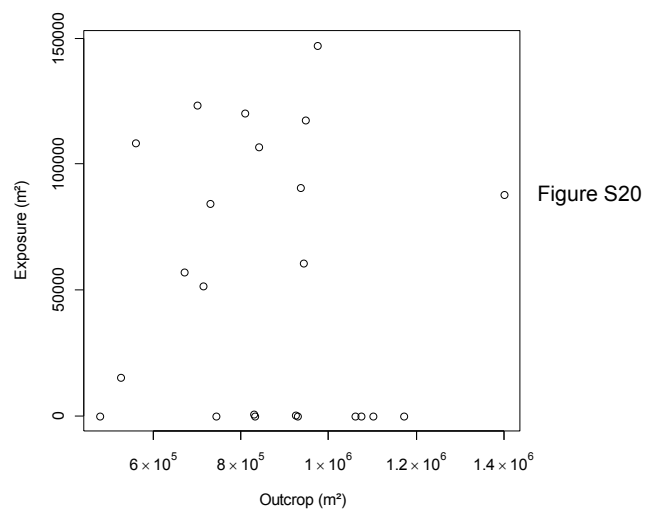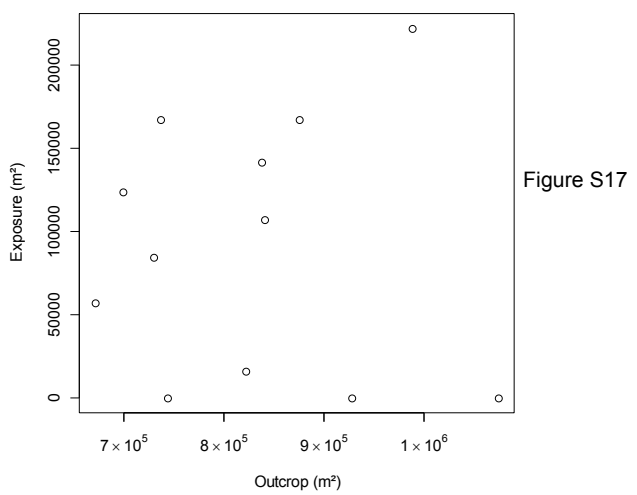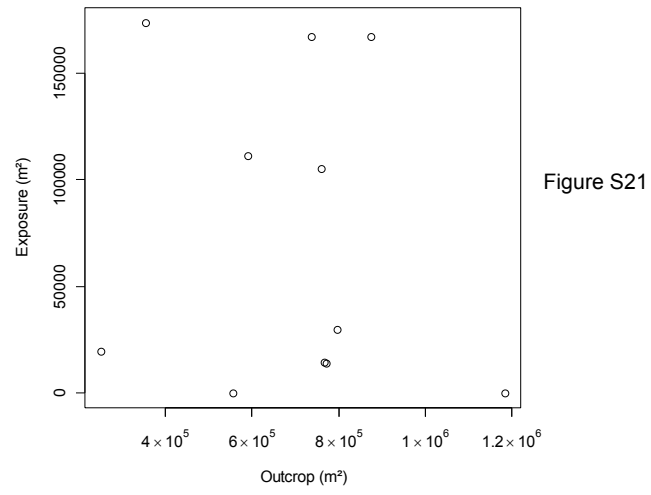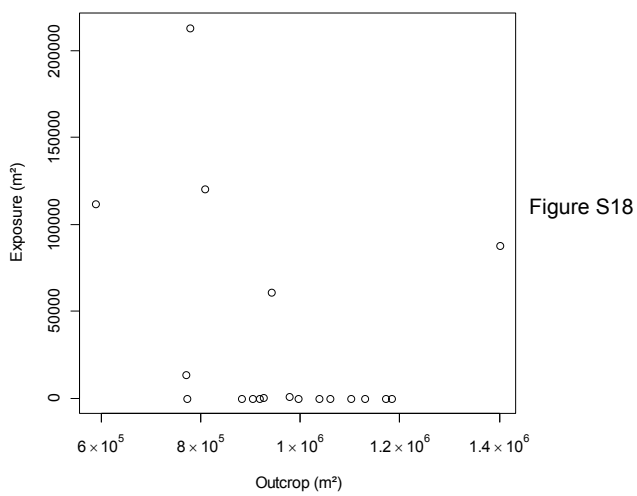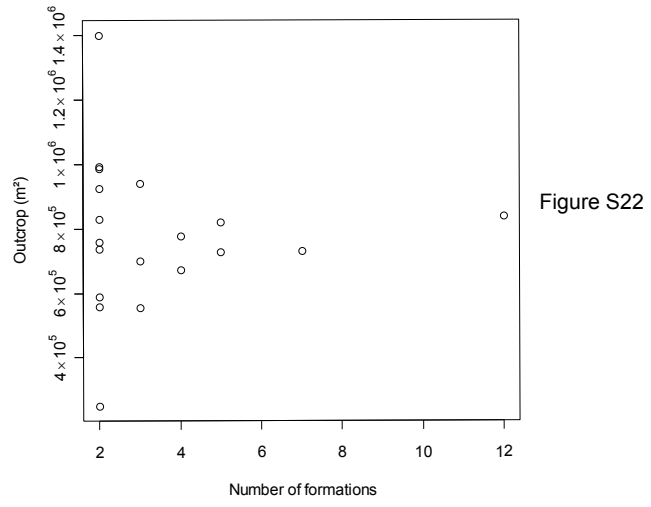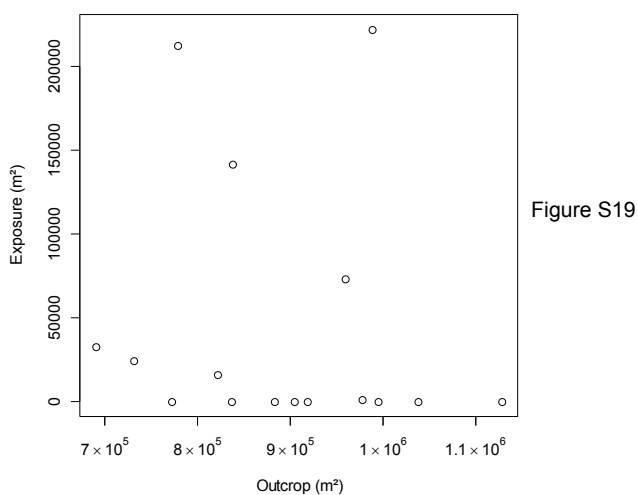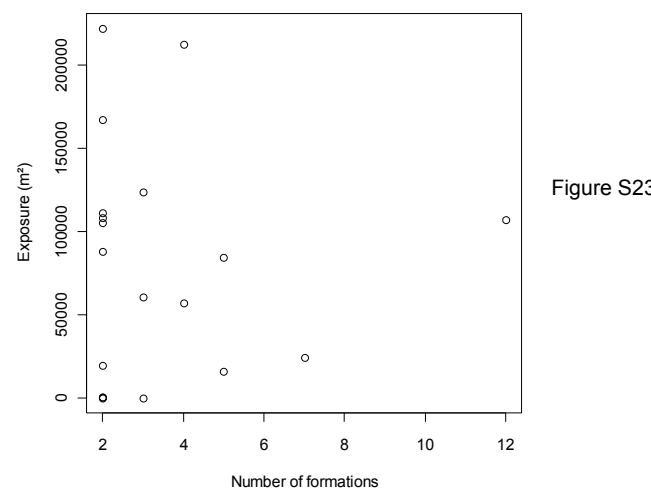



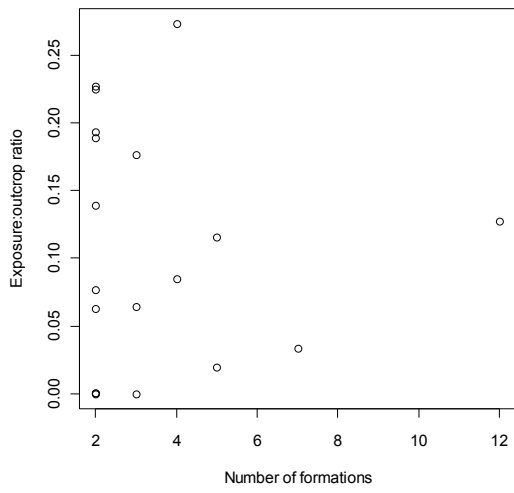

Figure S24

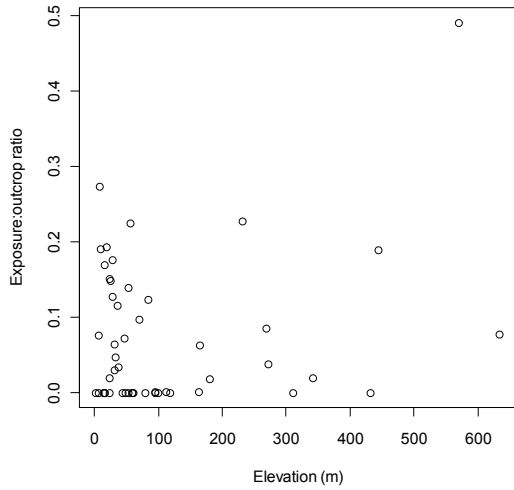

Figure S25

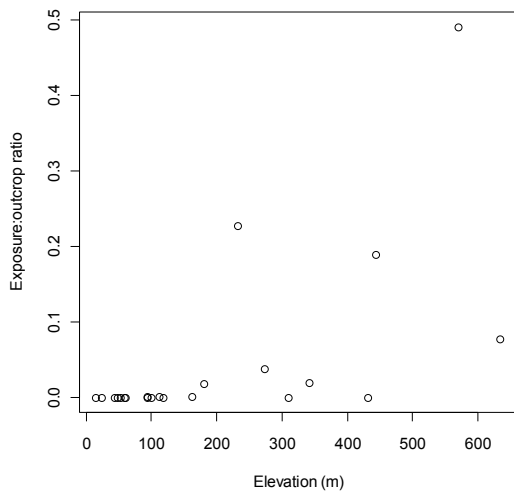

Supplement: Supplementary file 1 [file 23291525]
